# Supplementary material
Source: ML conference proceedings conference paper supplement (https://openreview.net/forum?id=EoFNy62JGd)
Supplement: supplementary_material [file attachment]

## **Requirements:**

Pytorch

Torchvision

Pandas

Bokeh

MLflow

numpy

## **Pruning**

### **Homogenous**

```
python main.py --dataset <imagenet/cifar10/cifar100> --model  
<resnet/vgg/densenet> -b 256 --datasets-dir <dataset_dir> --model-config  
"{'zeroBN':True}" --stochasticPruning <sparsity ratio required>
```

### **Heterogenous**

```
python main.py --dataset <imagenet/cifar10/cifar100> --model  
<resnet/vgg/densenet> -b 256 --datasets-dir <dataset_dir> --model-config  
"{'zeroBN':True}" --stochasticPruning <sparsity ratio required> --  
preserve_cosine --layers_cos_sim1 "layer2" --cos_sim1 0.95 --  
layers_cos_sim2 "layer3" --cos_sim2 0.98 --layers_cos_sim3 "layer4" -  
-cos_sim3 0.98 --max_sparsity 0.9
```

## **Quantization**

```
python main_1_per_layer_loss_scale.py --dataset <imagenet/cifar> --  
model resnet --model-config "{'depth': <18/101>}" --smart-loss-scale-  
and-exp-bits --enable-scheduler --datasets-dir <dataset_dir> > --exp-bits  
<E> --fp-bits <bits> --calibrate-bn
```
